# Supplementary material for: Involvement of Protein Kinase R in Double-Stranded RNA-Induced Proteasomal Degradation of Hypoxia Inducible Factor-1α
Source: Springer Nature journal article supplement (doi:10.1007/s10753-023-01881-8), 2023-08-24
Supplement: MOESM1 [file 25958974]

# Supplemental Fig.1

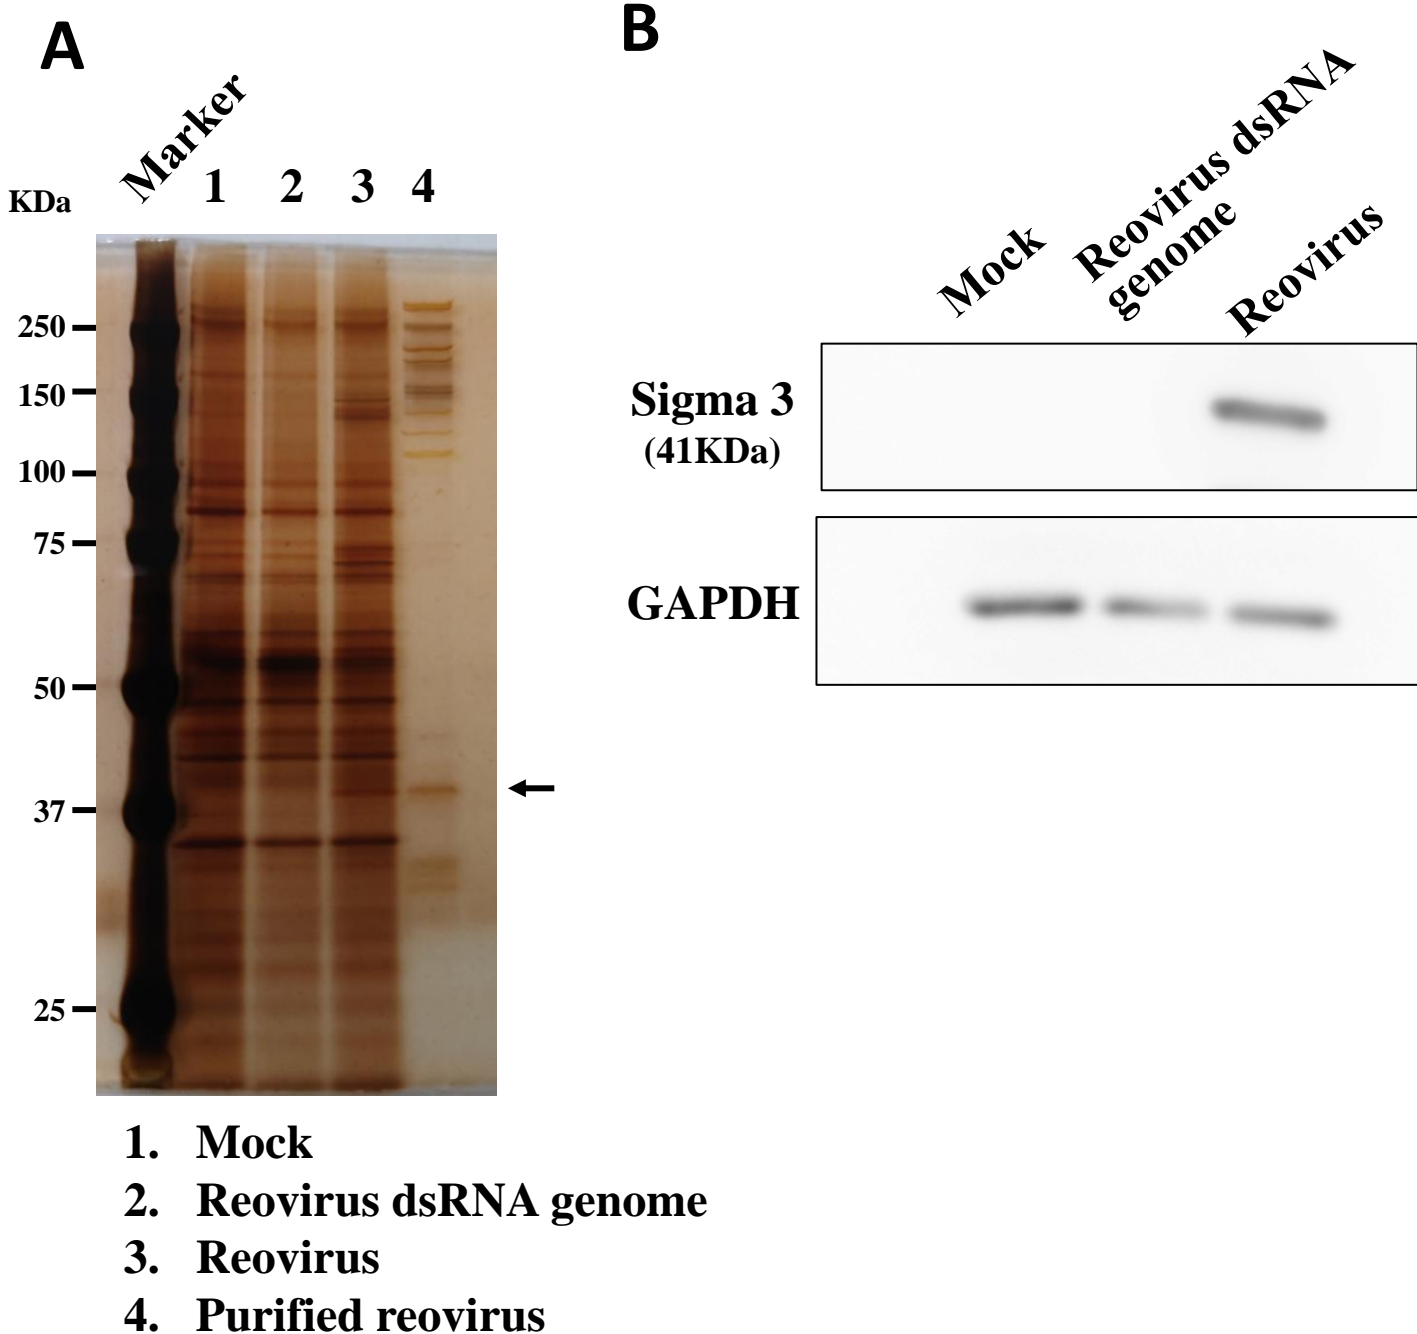

## Supplemental Fig.1

Undetectable levels of virus protein expression following transfection with the reovirus dsRNA genome. H1299 cells were seeded on a 12-well plate at a density of  $5 \times 10^4$  cells/well. On the following day, cells were transfected with the reovirus dsRNA genome at 4 ng/mL using Lipofectamine RNAiMAX, and were infected with reovirus at a multiplicity of infection (MOI) of 50. Following a 24-h incubation, cells were recovered, followed by SDS-PAGE and silver staining of cellular proteins (A) and western blotting analysis of sigma 3 protein expression in the cells (B). The arrow at the right side indicates the bands predicted for sigma 3 protein.

# Supplemental Fig.2

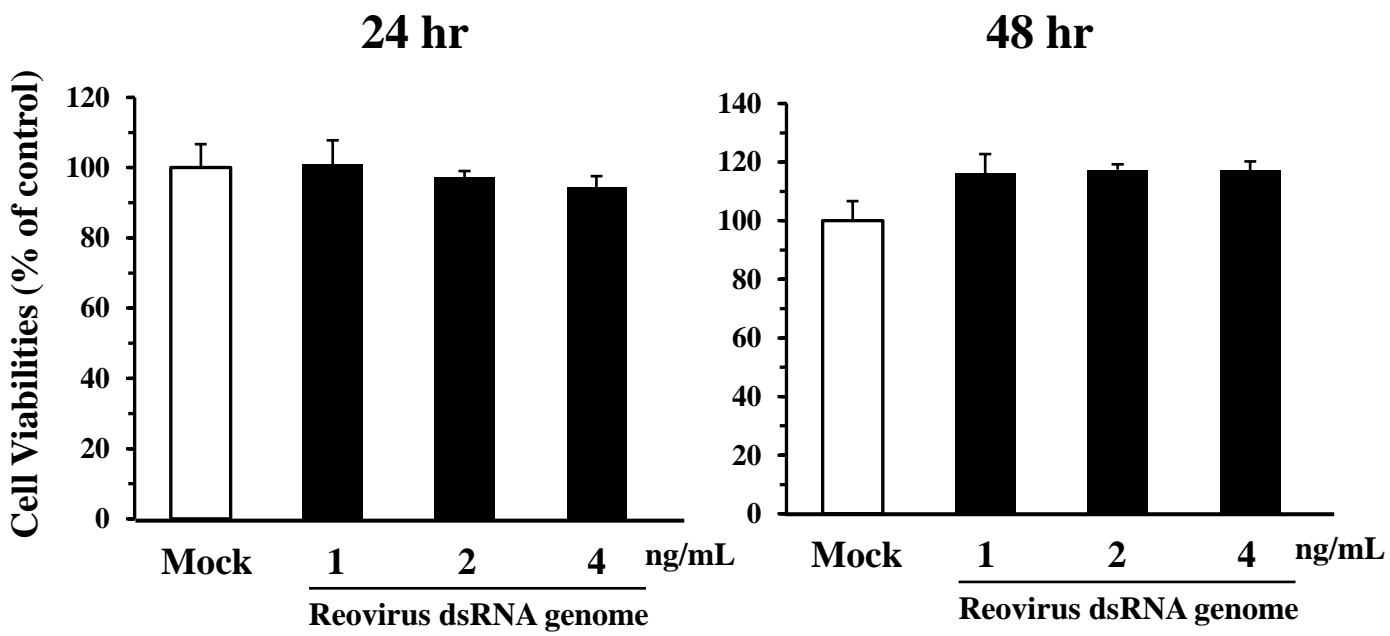

## Supplemental Fig.2

Cell viabilities following transfection with the reovirus dsRNA genome. H1299 cells were seeded on a 96-well plate at a density of  $1 \times 10^4$  cells/well. On the following day, cells were transfected with the reovirus dsRNA genome at the indicated doses using Lipofectamine RNAiMAX. Following 24-h and 48-h incubation, cell viabilities were determined by a WST-8 assay. Data are expressed as means  $\pm$  S.D. (n=4).

# Supplemental Fig.3

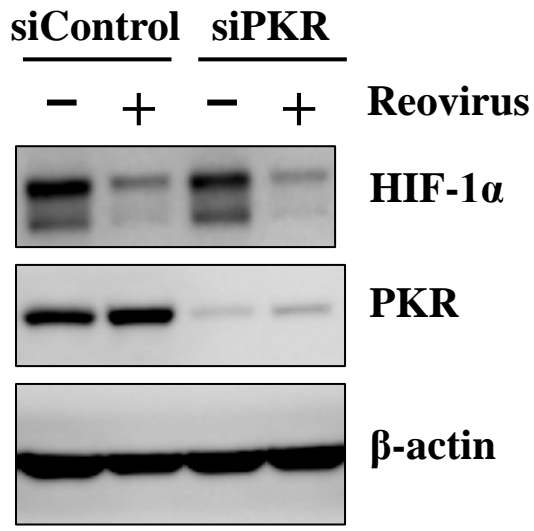

### Supplemental Fig.3

Reovirus-mediated down-regulation of HIF-1α in a PKR-independent manner. H1299 cells were transfected with an siRNA against PKR at 50 nM. Following a 24-h incubation, cells were infected with reovirus at an MOI of 20. Cell lysates were prepared 24 h after infection, followed by western blotting analysis. Representative images of two independent experiments are shown.

# Supplemental Fig.4

**A**

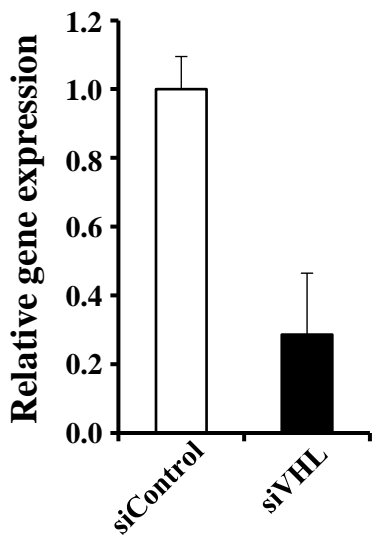

**B**

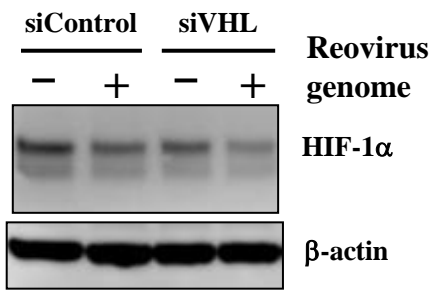

## Supplemental Fig.4

dsRNA-mediated down-regulation of HIF-1 $\alpha$  in a VHL-independent manner. H1299 cells were transfected with an siRNA against VHL at 50 nM. Following a 24-h incubation, cells were transfected with the reovirus dsRNA genome at 4 ng/mL. Real-time RT-PCR analysis was performed 24 h after siRNA transfection. Cell lysates were prepared 24 h after transfection with reovirus dsRNA genome, followed by western blotting analysis. Data are expressed as means  $\pm$  S.D. (n=4). The representative images from at least two independent experiments are shown.

# Supplemental Fig.5

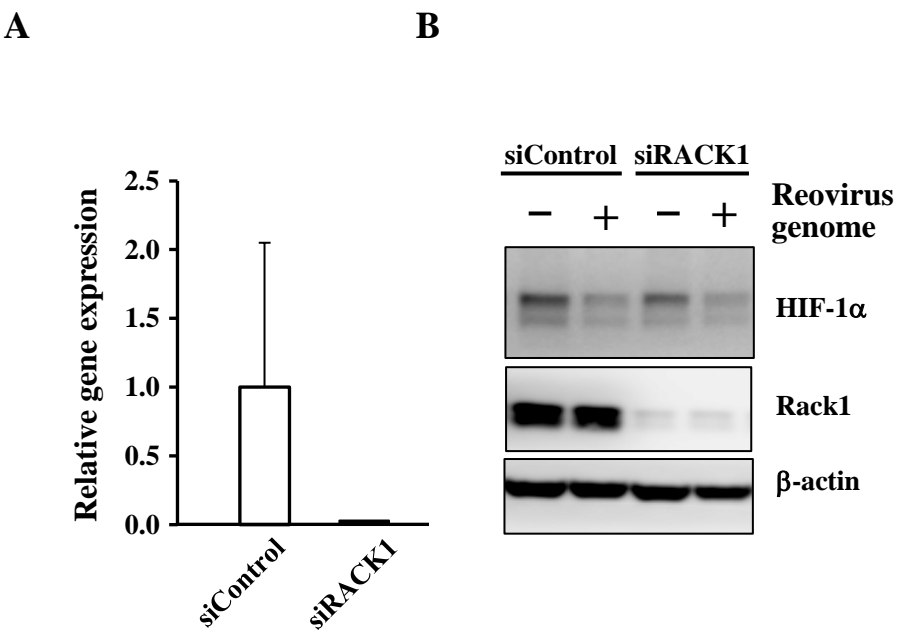

## Supplemental Fig.4

dsRNA-mediated down-regulation of HIF-1 $\alpha$  in a RACK1-independent manner. H1299 cells were transfected with an siRNA against RACK1 at 50 nM. Following a 24-h incubation, cells were transfected with the reovirus dsRNA genome at 4 ng/mL. Real-time RT-PCR analysis was performed 24 h after siRNA transfection. Cell lysates were prepared 24 h after transfection with the reovirus dsRNA genome, followed by western blotting analysis. Data are expressed as means  $\pm$  S.D. (n=4). The representative images from at least two independent experiments are shown.

# Supplemental Fig.6

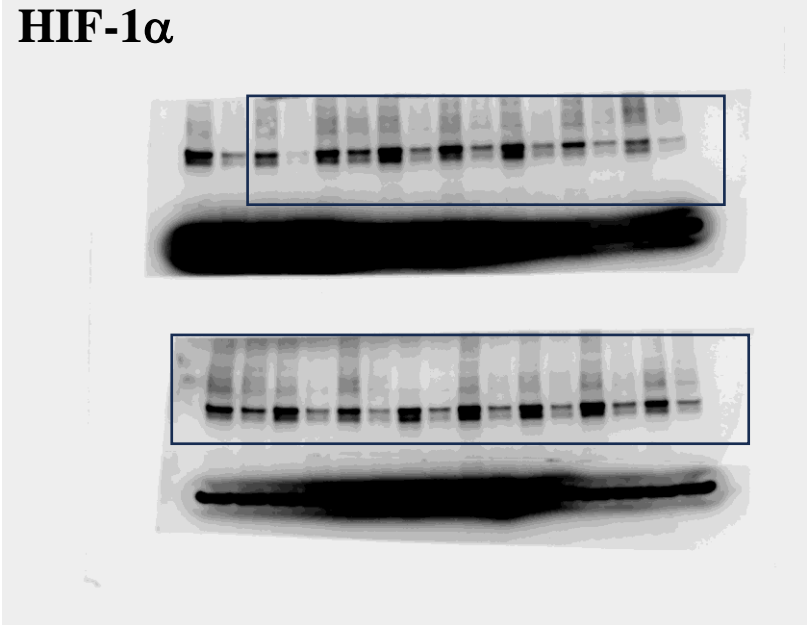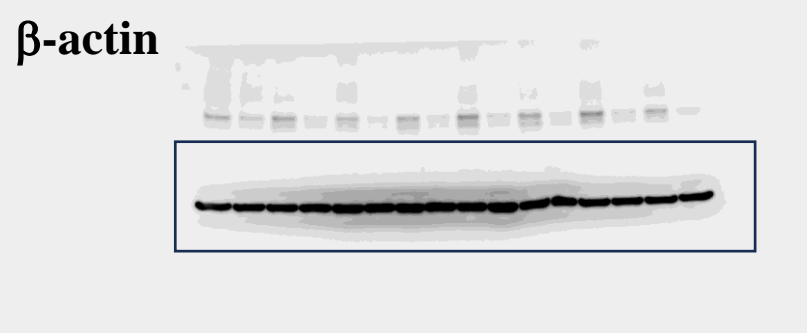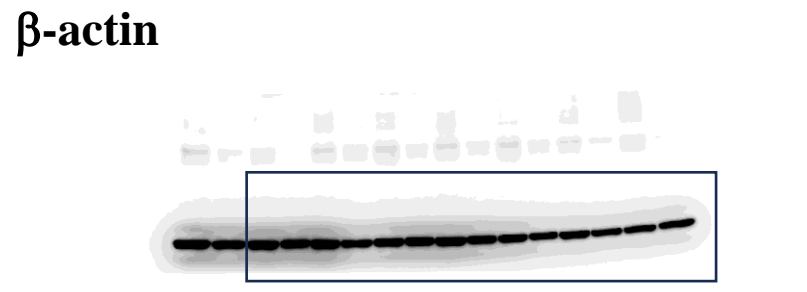

**Supplemental Fig.6**  
Raw image of western blots for HIF-1 $\alpha$  and  $\beta$ -actin in H1299 cells used in Figure 1B.

**Supplemental Fig.7**

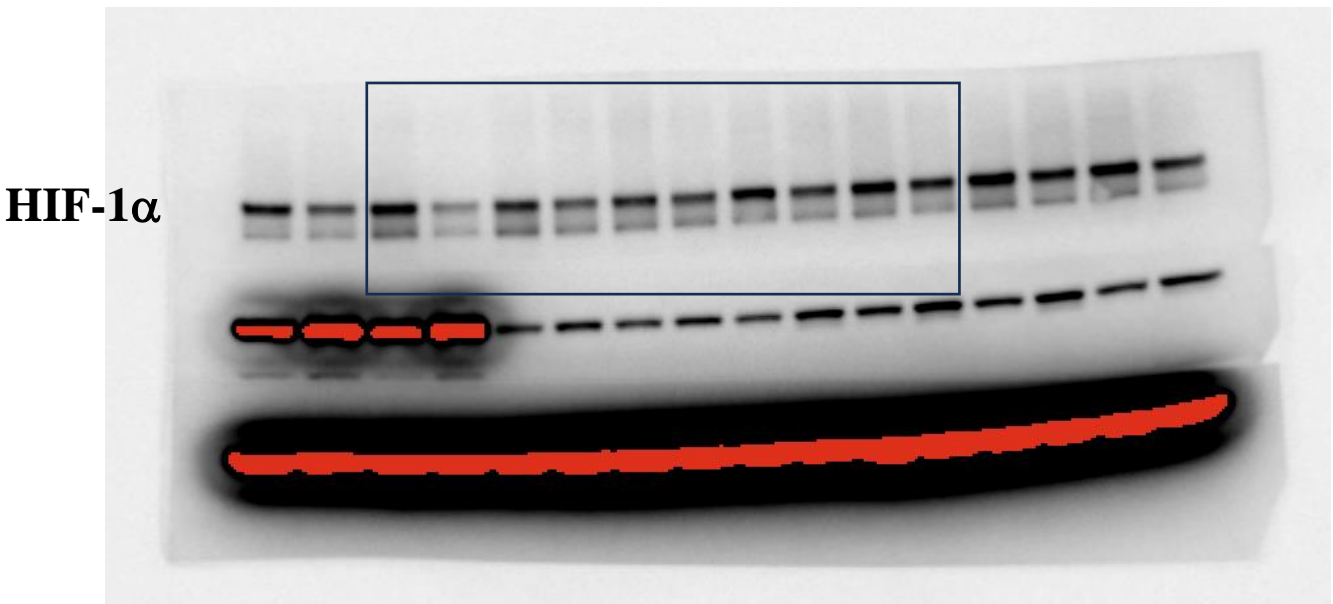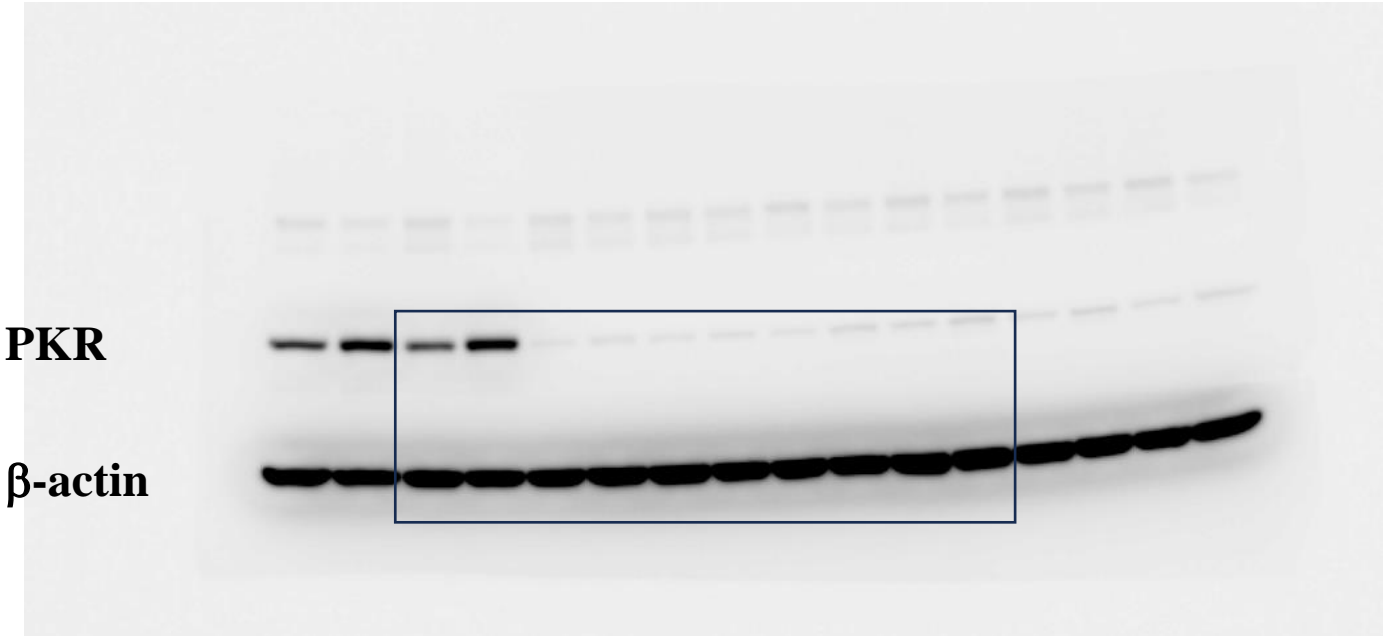

**Supplemental Fig.7**

Raw image of western blots for HIF-1α, PKR, and β-actin in H1299 cells used in Figure 1E.

# Supplemental Fig.8

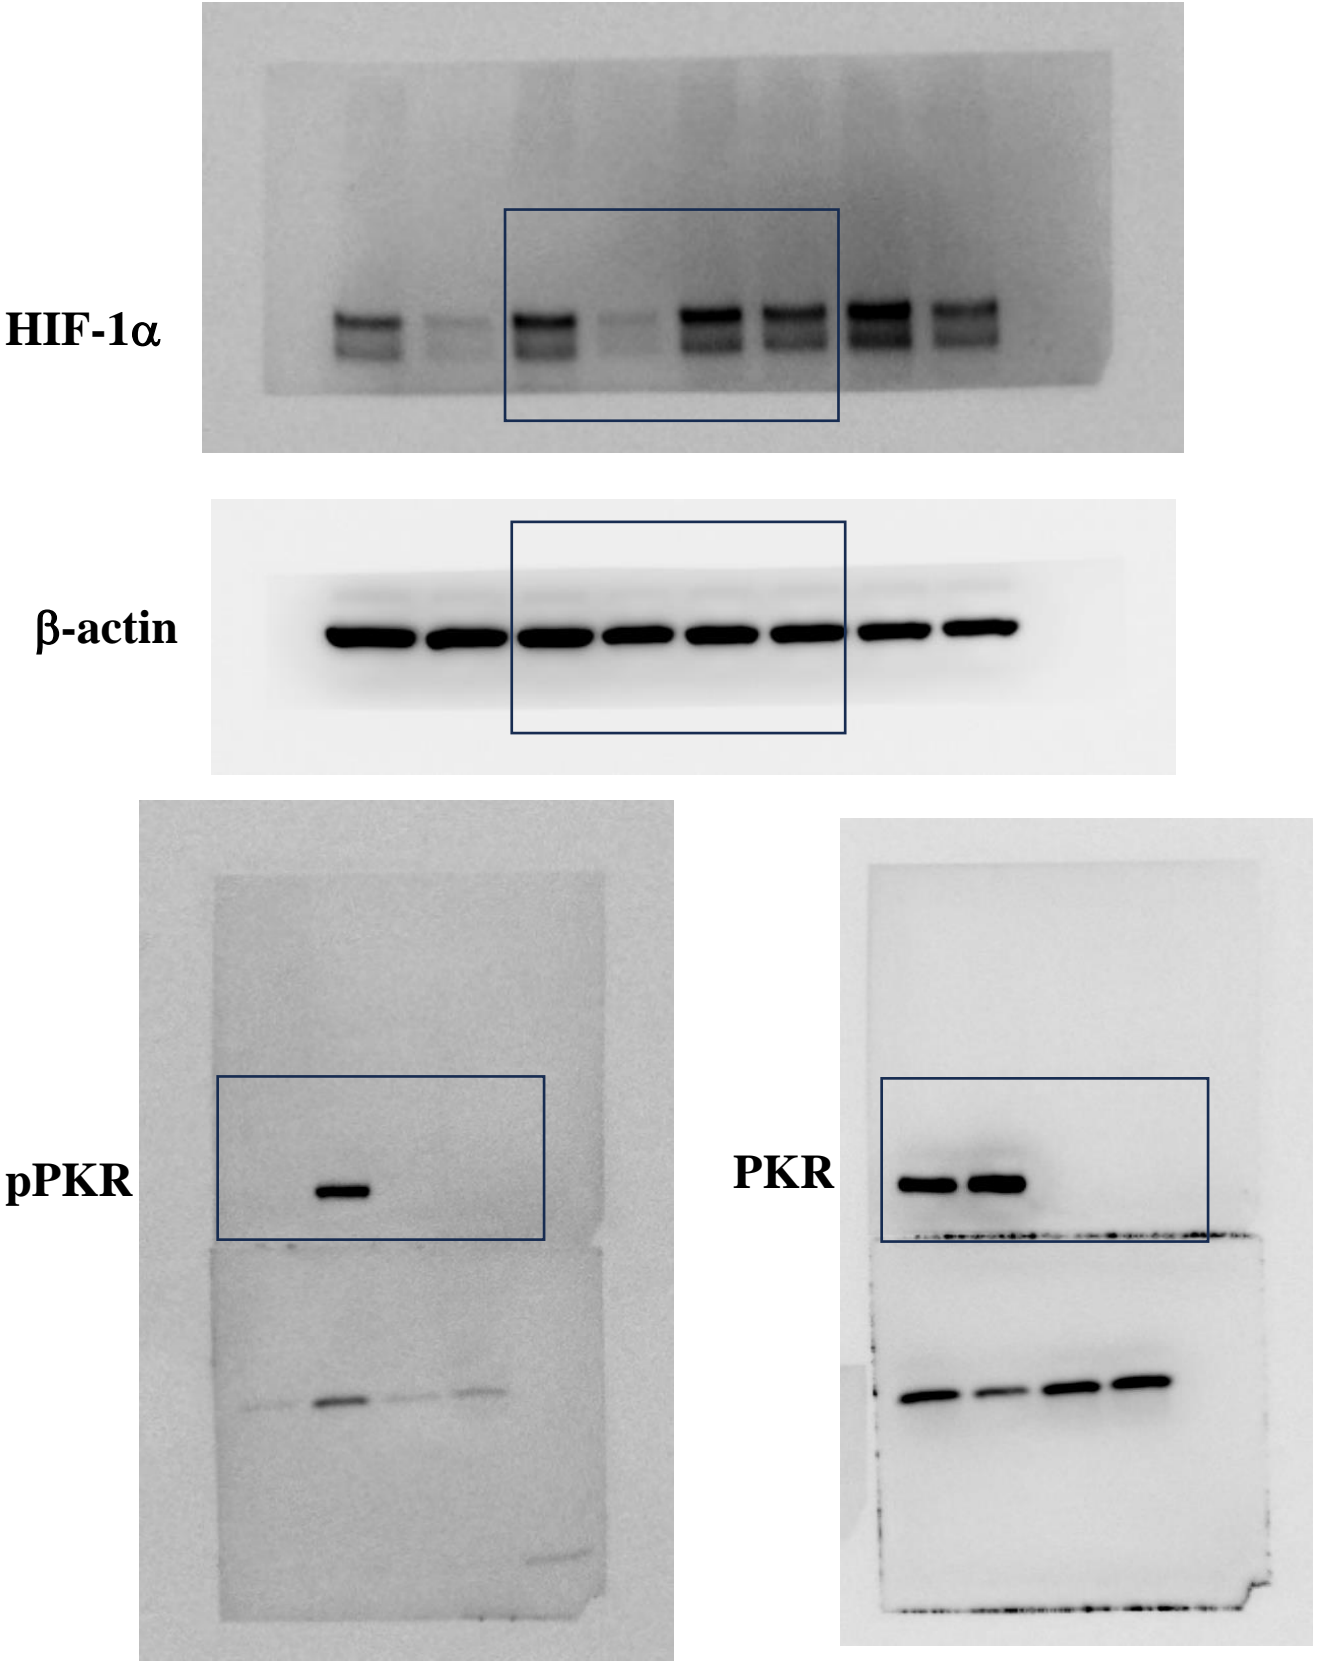

## Supplemental Fig.8

Raw image of western blots for HIF-1α, PKR, phosphorylated PKR (pPKR), and β-actin in H1299 cells used in Figure 1F.



# Supplemental Fig.9

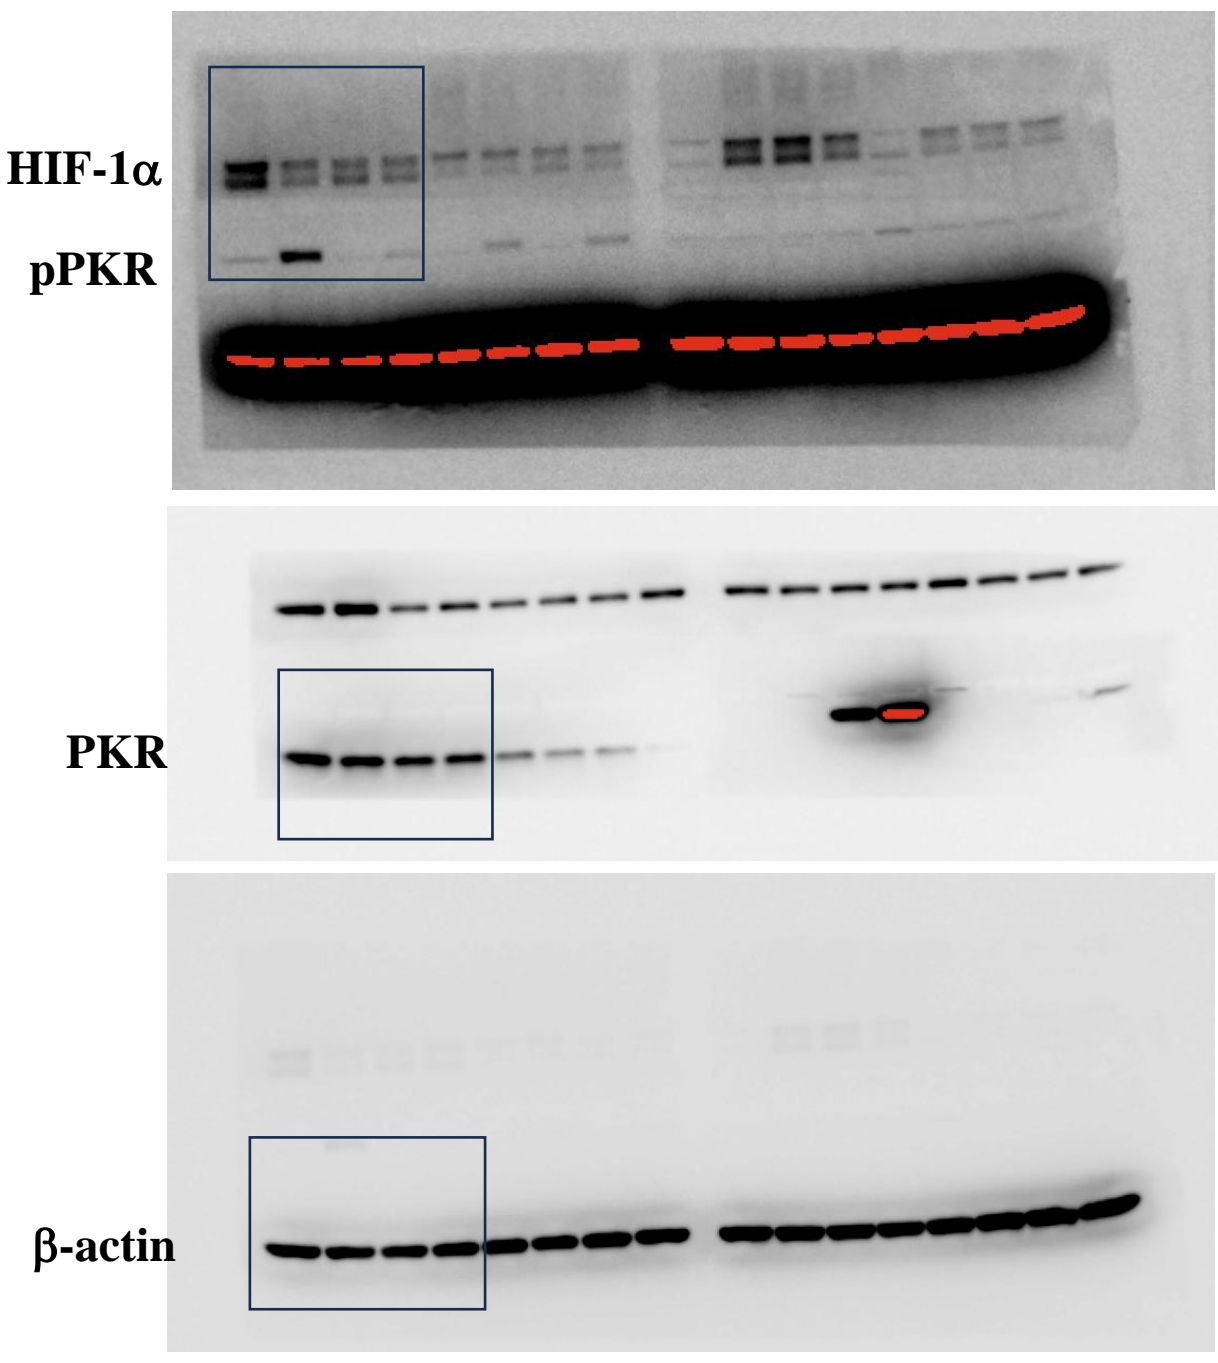

## Supplemental Fig.9

Raw image of western blots for HIF-1α, PKR, phosphorylated PKR (pPKR), and β-actin in H1299 cells used in Figure 2A.

# Supplemental Fig.10

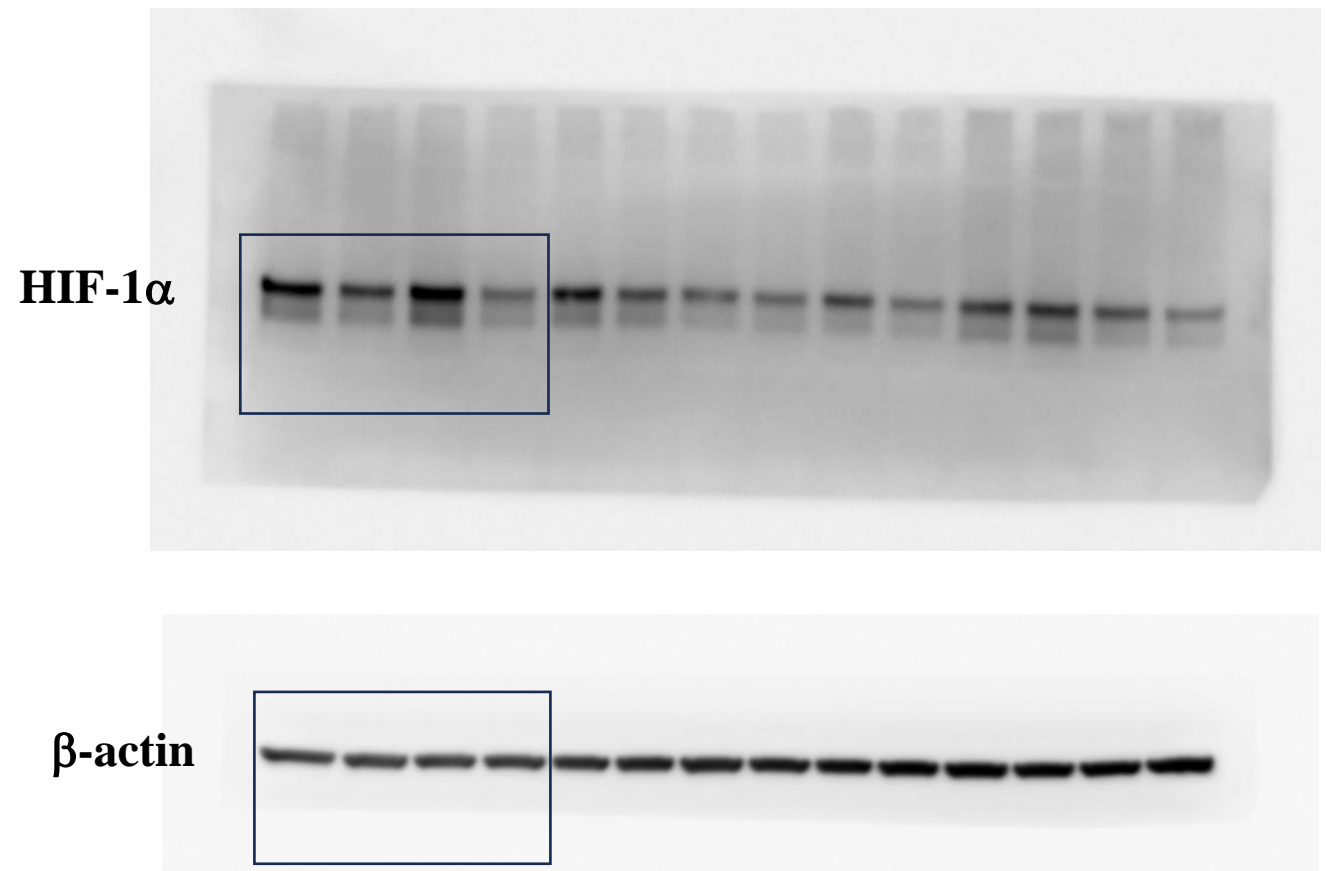

## Supplemental Fig.10

Raw image of western blots for HIF-1 $\alpha$  and  $\beta$ -actin in H1299 cells used in Figure 2C.

# Supplemental Fig.11

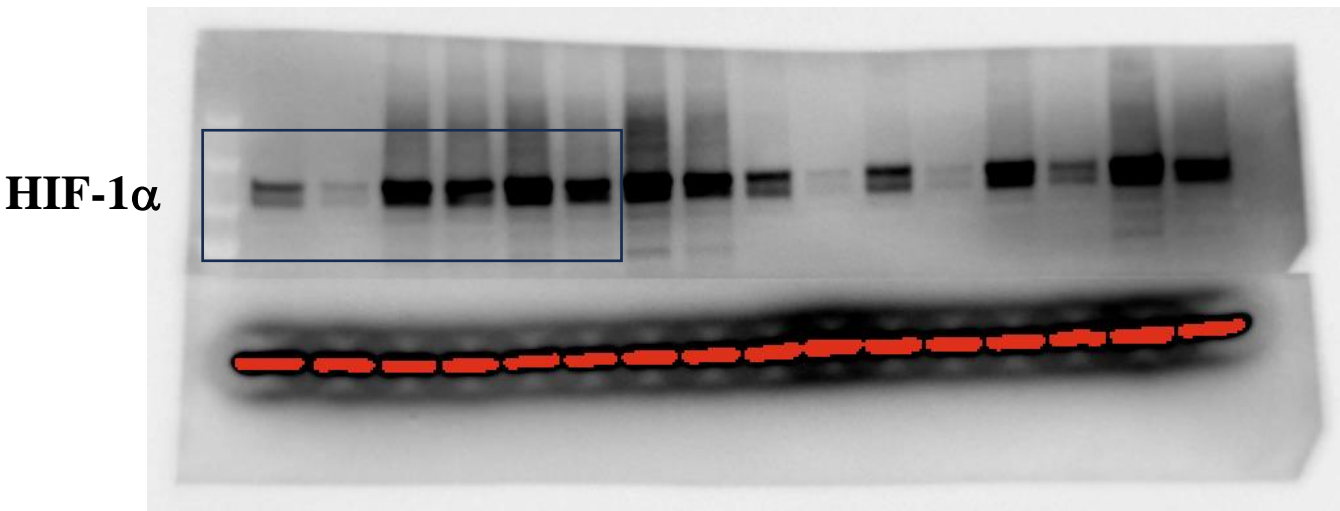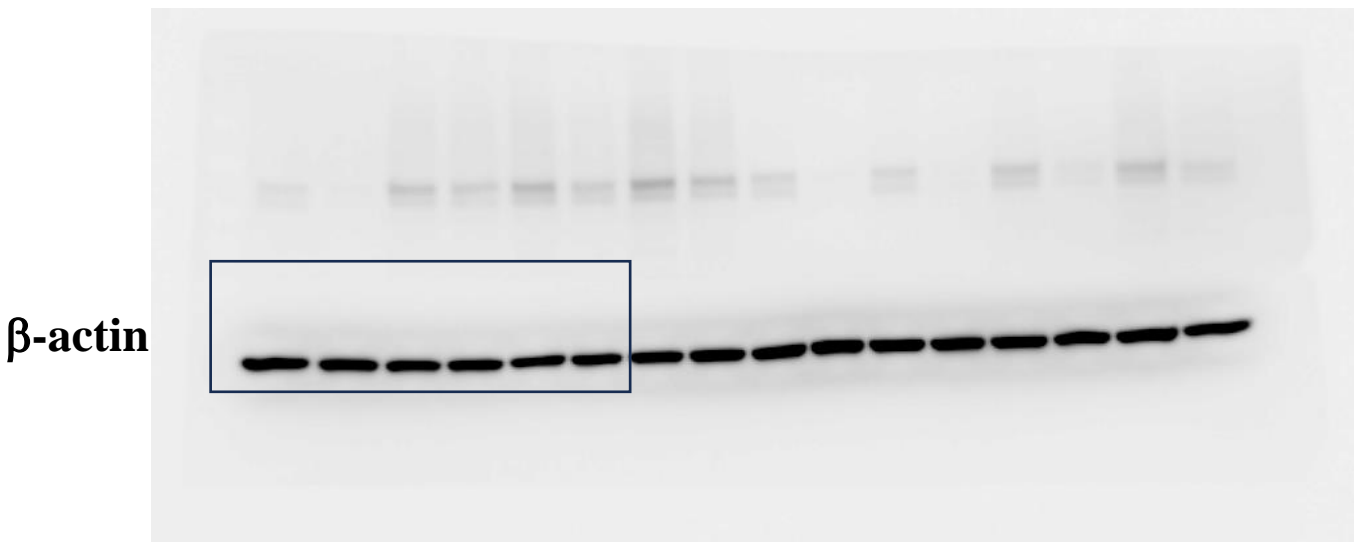

## Supplemental Fig.11

Raw image of western blots for HIF-1 $\alpha$  and  $\beta$ -actin in H1299 cells used in Figure 3A.

# Supplemental Fig.12

HIF-1 $\alpha$

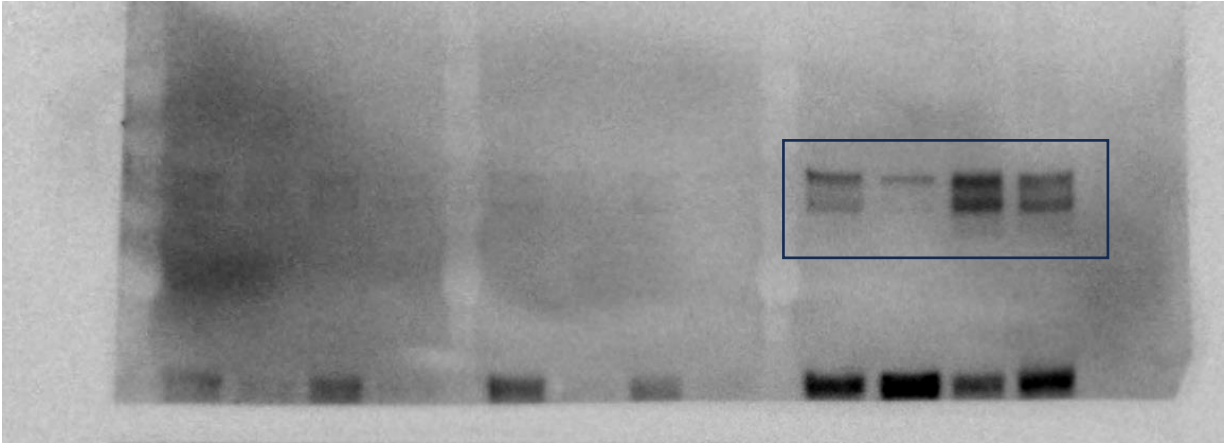

$\beta$ -actin

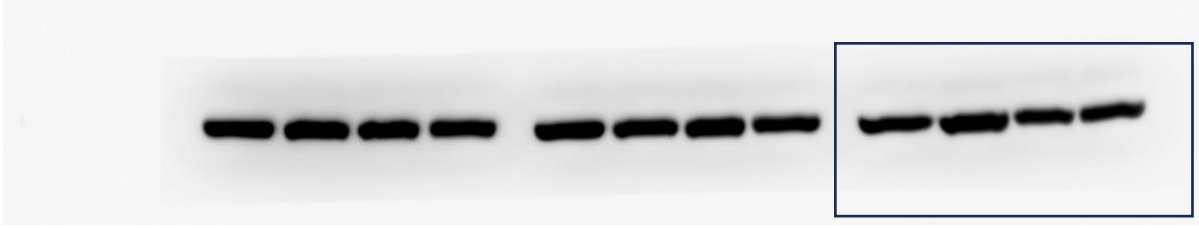

## Supplemental Fig.12

Raw image of western blots for HIF-1 $\alpha$  and  $\beta$ -actin in H1299 cells used in Figure 3B.

**Supplemental Fig.13**

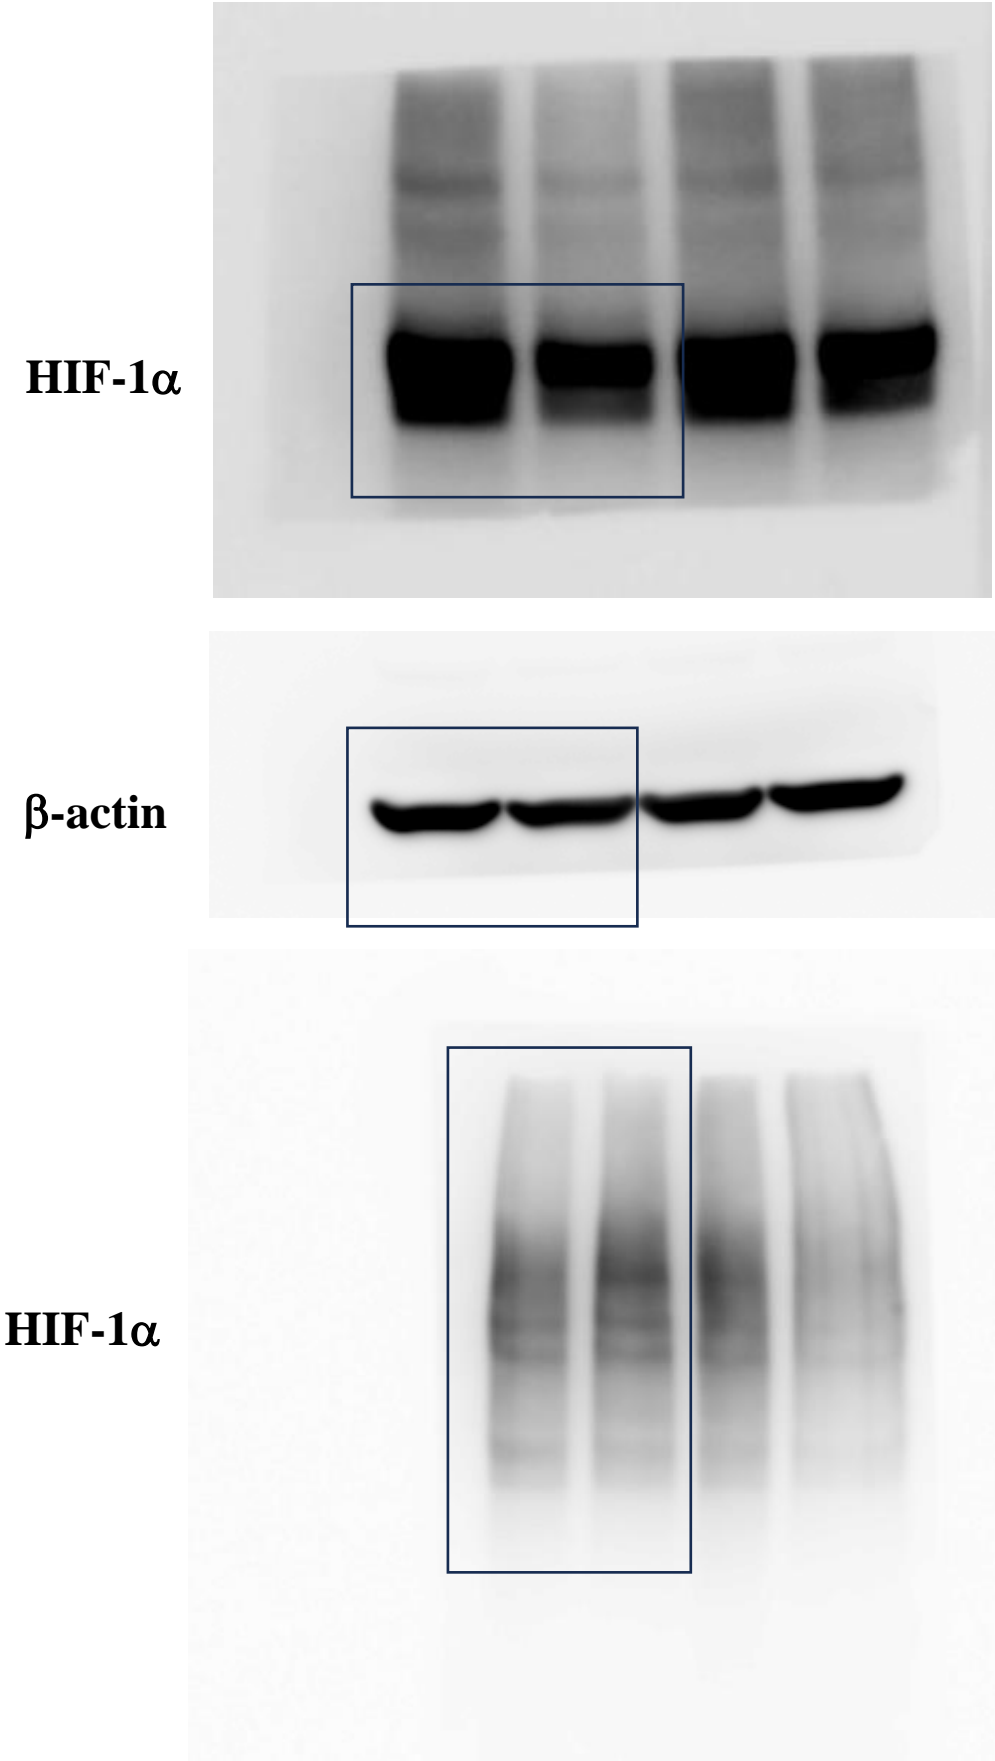

**Supplemental Fig.13**

Raw image of western blots for HIF-1α and β-actin in H1299 cells used in Figure 3C.

**Supplemental Fig.14**

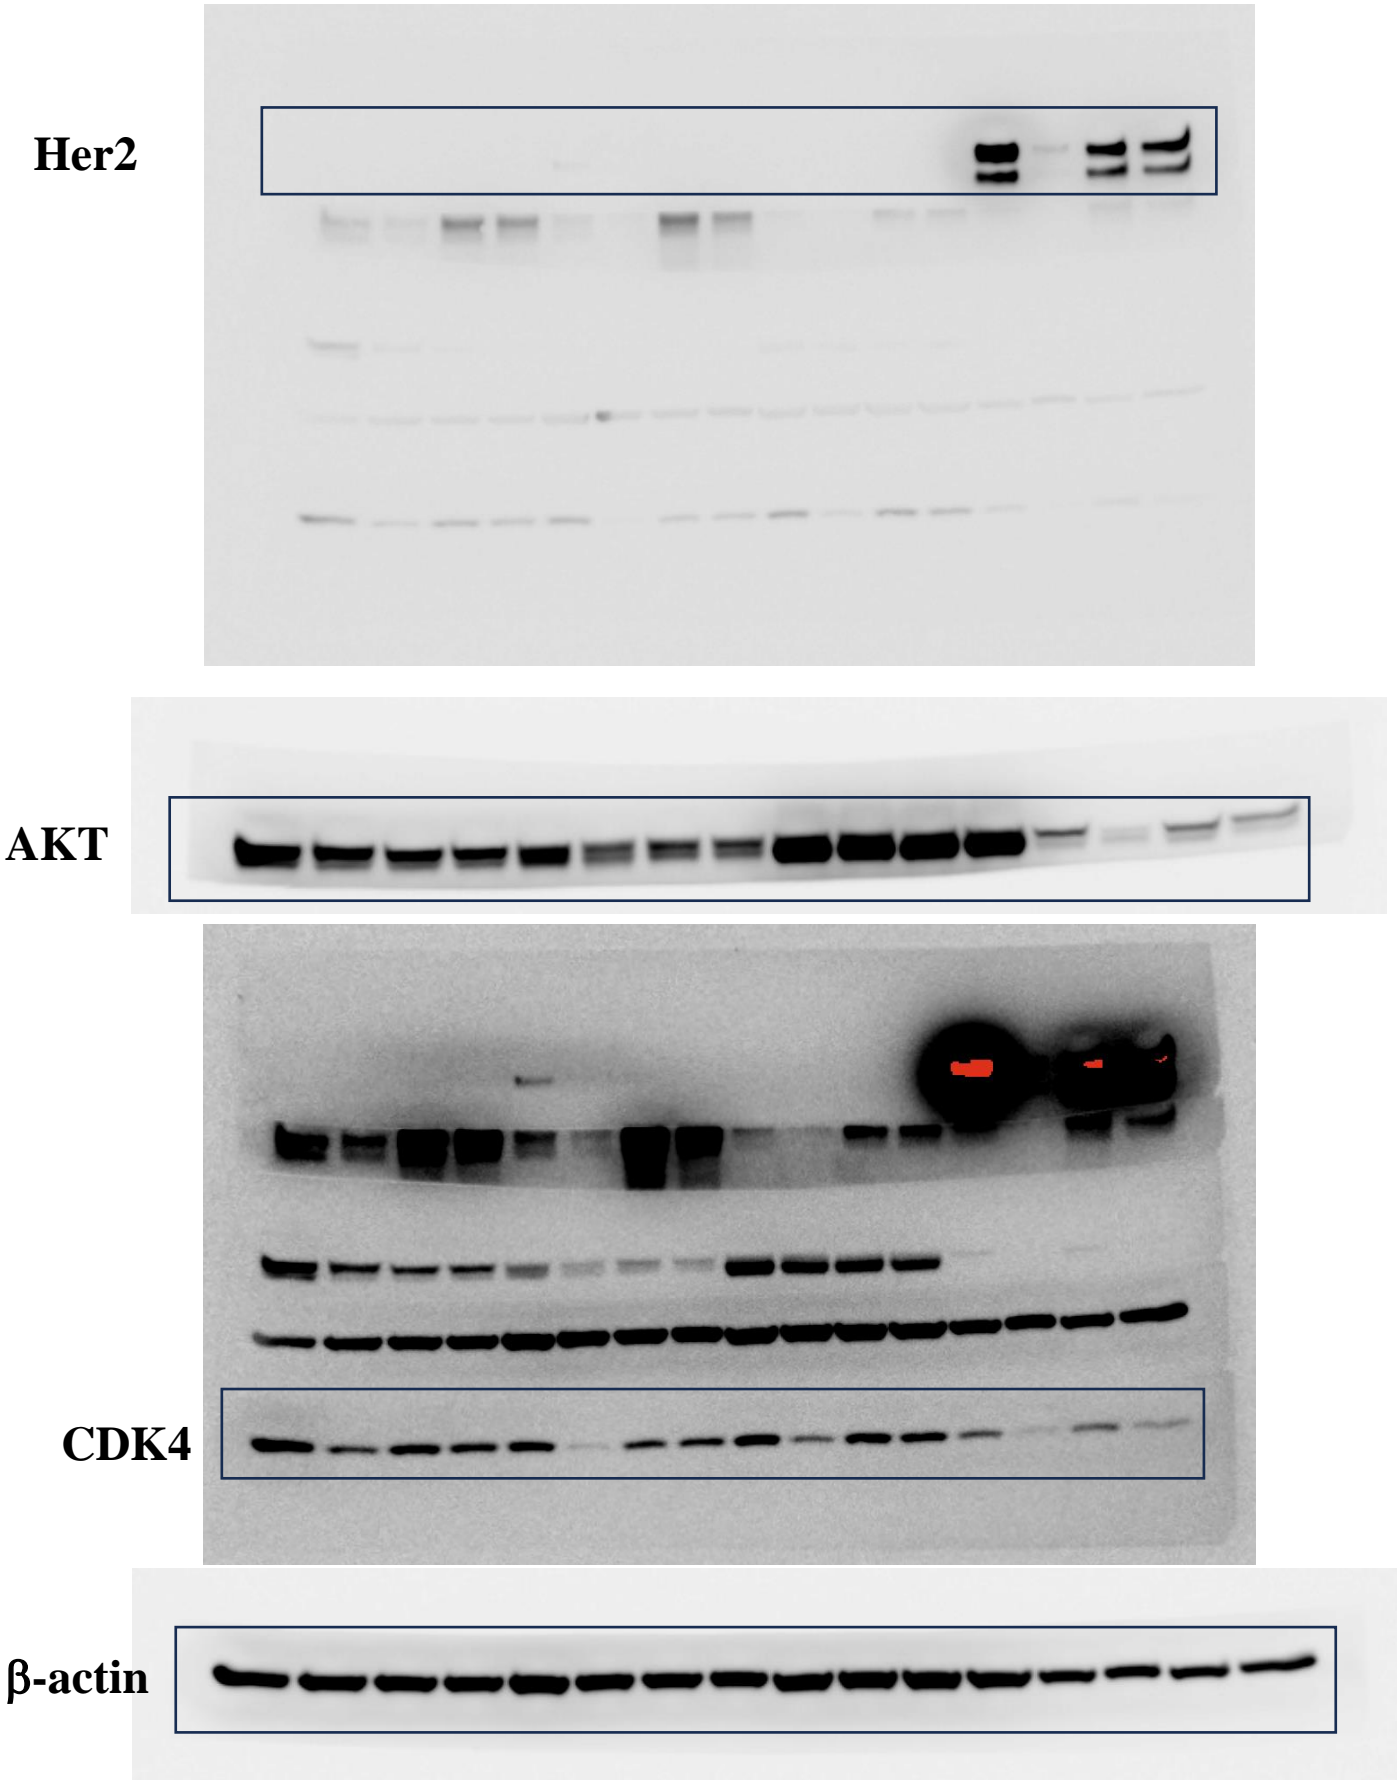

**Supplemental Fig.14**

Raw image of western blots for HIF-1 $\alpha$  and  $\beta$ -actin in human cultured cells used in Figure 4A.

# Supplemental Fig.15

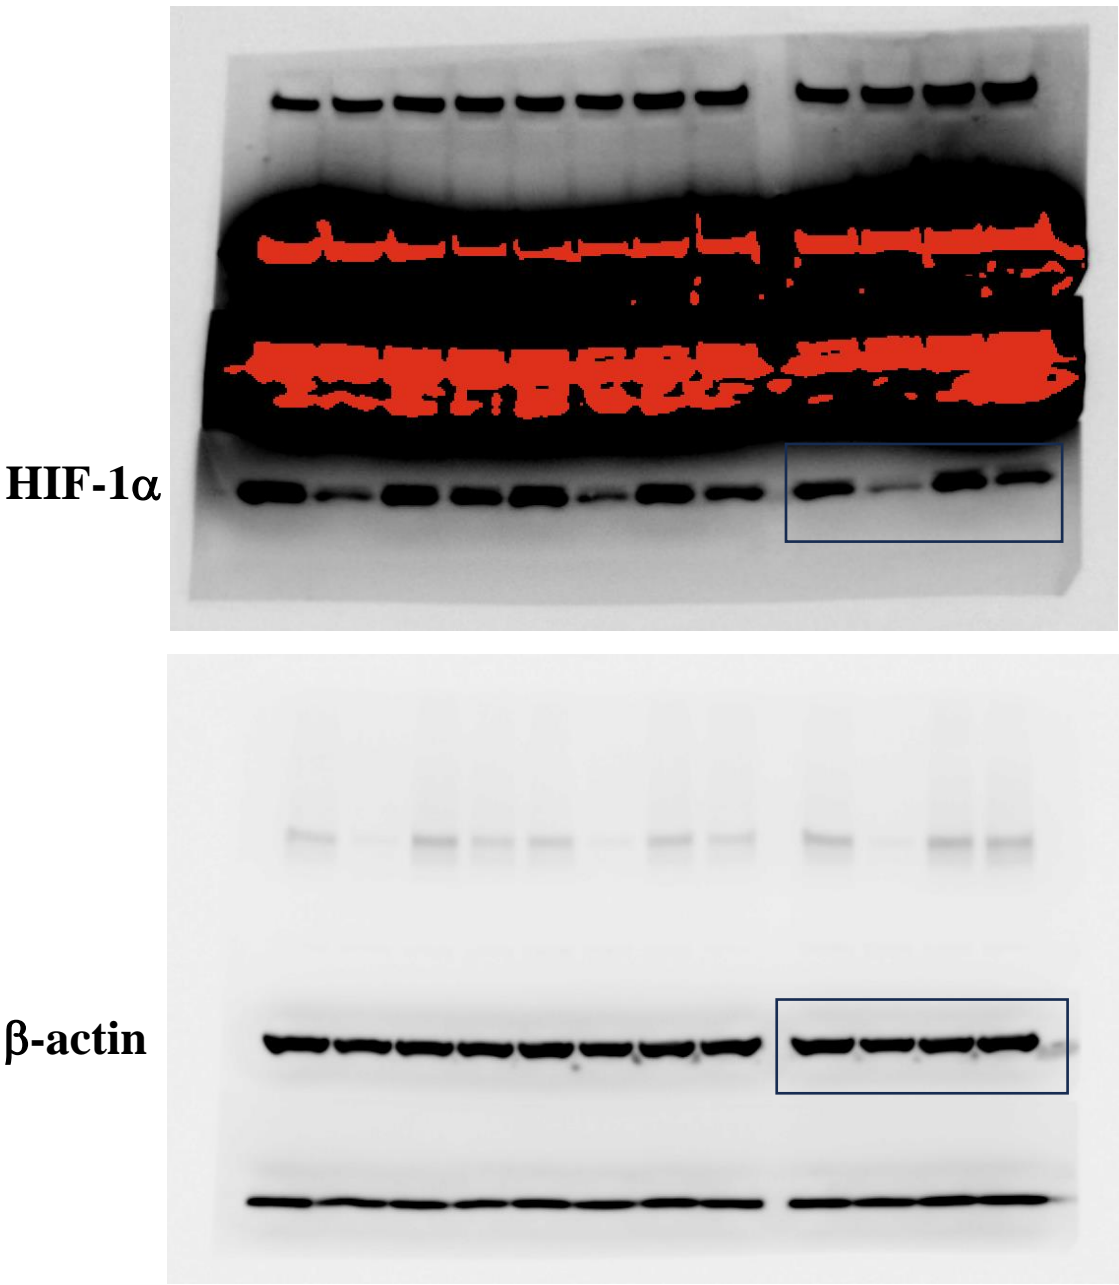

## Supplemental Fig.15

Raw image of western blots for HIF-1α and β-actin in H1299 cells used in Figure 4B.

# Supplemental Fig.16

**Sigma 3**

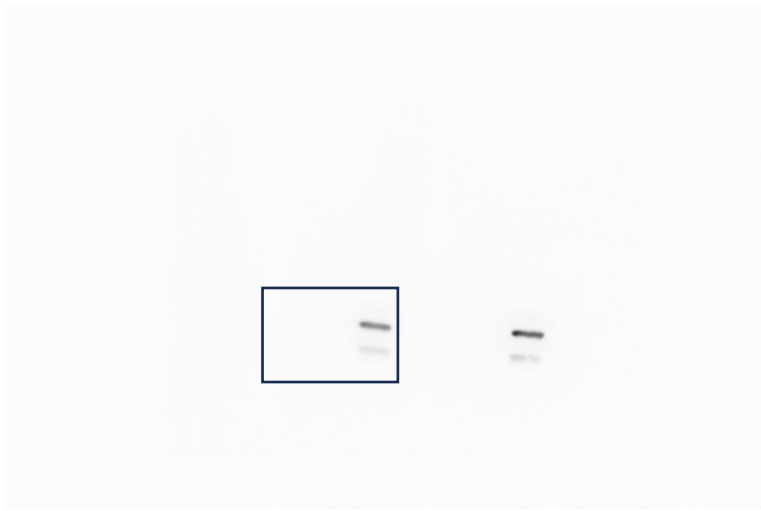

**GAPDH**

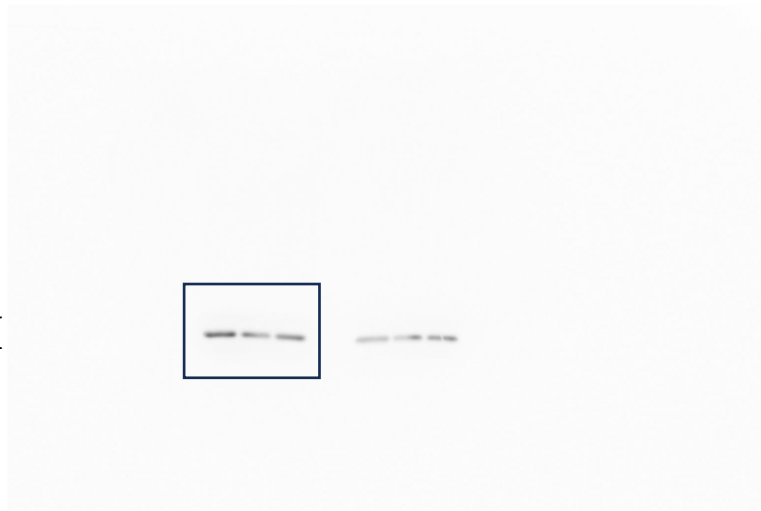

## Supplemental Fig.16

Raw image of western blots for reovirus sigma 3 and GAPDH in H1299 cells used in Supplemental Figure 1B.



# Supplemental Fig.17

**HIF-1 $\alpha$**

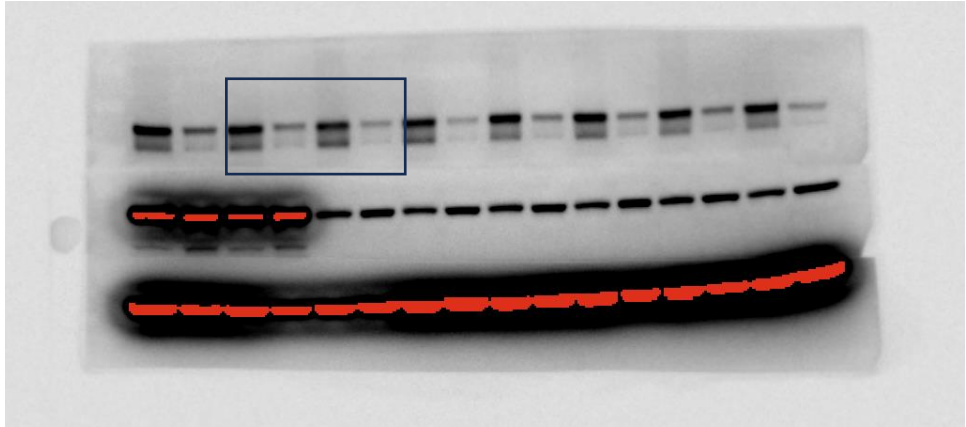

**PKR**

**$\beta$ -actin**

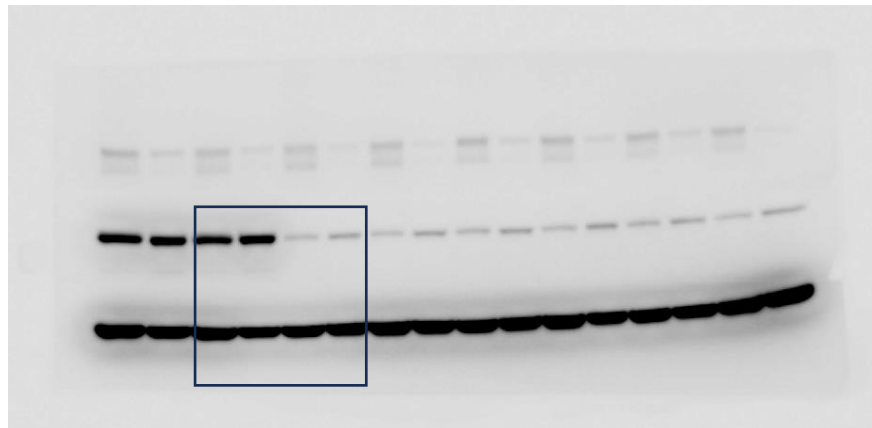

## Supplemental Fig.17

Raw image of western blots for HIF-1 $\alpha$ , PKR, and  $\beta$ -actin in H1299 cells used in Supplemental Figure 3.

# Supplemental Fig.18

HIF-1 $\alpha$

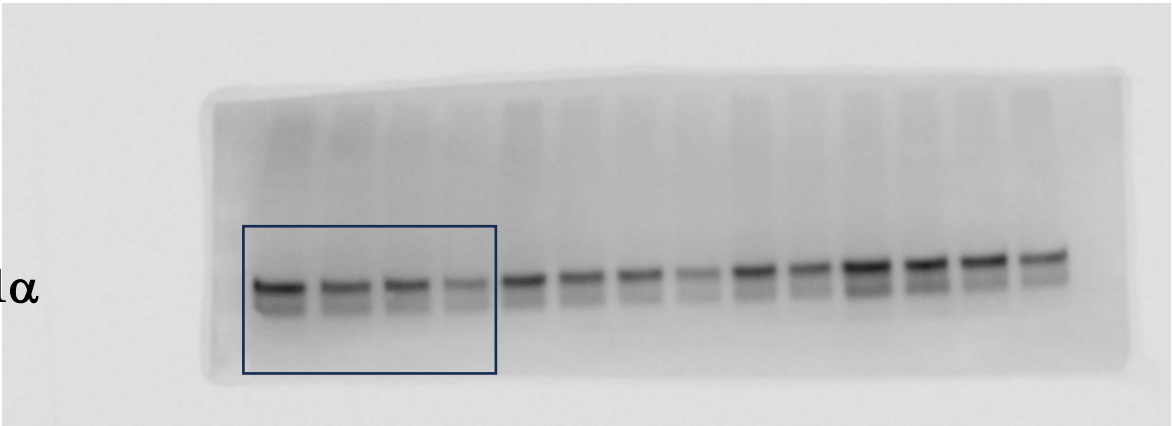

$\beta$ -actin

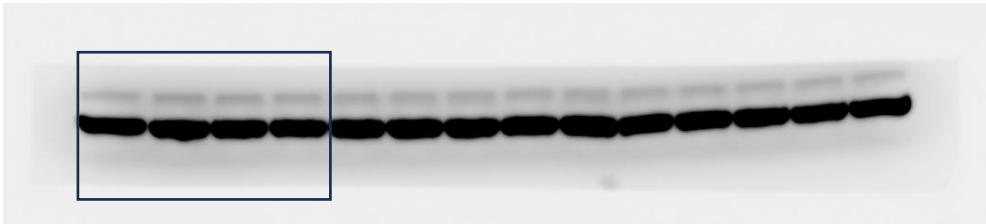

## Supplemental Fig.18

Raw image of western blots for HIF-1 $\alpha$  and  $\beta$ -actin in H1299 cells used in Supplemental Figure 4B.

# Supplemental Fig.19

**HIF-1 $\alpha$**

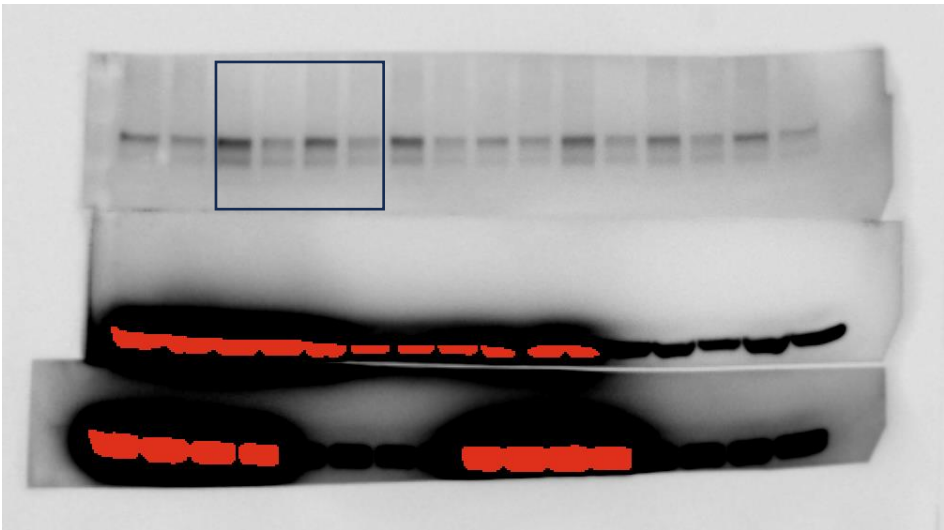

**$\beta$ -actin**

**RACK1**

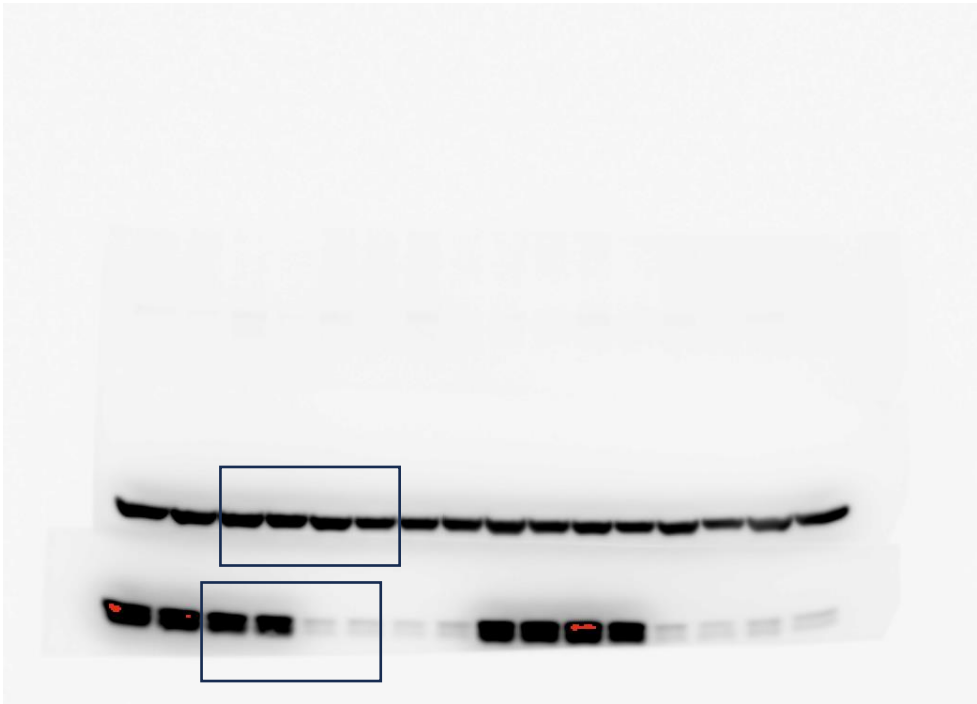

## Supplemental Fig.19

Raw image of western blots for HIF-1 $\alpha$ , RACK1, and  $\beta$ -actin in H1299 cells used in Supplemental Figure 5B.
