# Supplementary material for: Involvement of Protein Kinase R in Double-Stranded RNA-Induced Proteasomal Degradation of Hypoxia Inducible Factor-1α
Source: Springer Nature journal article supplement (doi:10.1007/s10753-023-01881-8), 2023-08-24
Supplement: MOESM2 [file 25958974]

**Supplemental Table 1.** Targeted sequences of siRNAs used in this study.

| siRNA   | Targeted sequence (sense strand; 5' to 3') |
|---------|--------------------------------------------|
| siIPS-1 | UAGUUGAUCUCGCGGACGA                        |
| siTLR3  | CAGCAUCUGUCUUUAAUAA                        |
| siMyD88 | GGAGGAUUGCCAAAAGUAU                        |
| siTRIF  | GACCAGACGCCACUCCAAC                        |
| siTBK1  | GACAGAAGUUGUGAUCACA                        |
| siDHX9  | GAAGUGCAAGCGACUCUAG                        |
| siPKR   | GGUGAAGGUAGAUCAAAGA                        |
| siPKR-2 | GACGGAAAGACUUACGUUA                        |
